# Supplementary material for: The influence of interviewers on survey responses among female sex workers in Zambia
Source: Springer Nature journal article supplement (doi:10.1186/s12874-019-0703-2), 2019-03-15
Supplement: MOESM1 [file 16552270]

## **SUPPLEMENTARY MATERIALS**

**Title:** The influence of interviewers on survey responses among female sex workers in  
Zambia

**Supplementary Table 1: Regression forms for variables considered**

| <b>Variable</b>                                                | <b>Regression form used</b> |
|----------------------------------------------------------------|-----------------------------|
| Age                                                            | Linear                      |
| Ever married                                                   | Logistic                    |
| Currently divorced/separated                                   | Logistic                    |
| Education                                                      | Ordered logistic            |
| Able to read and write                                         | Logistic                    |
| Monthly income (ZMW)                                           | Ordered logistic            |
| Financial situation                                            | Ordered logistic            |
| Mobile phone ownership                                         | Logistic                    |
| Self-perceived relative SES                                    | Poisson                     |
| Any income from non-sex-work                                   | Logistic                    |
| Age at first sex for money                                     | Linear                      |
| Condoms available while working                                | Ordered logistic            |
| Ask SWC to use a condom                                        | Ordered logistic            |
| SWCs ask to use a condom                                       | Ordered logistic            |
| SWCs request that not to use a condom                          | Ordered logistic            |
| ZMW price for vaginal sex with condom                          | Linear                      |
| ZMW price for vaginal sex without condom                       | Linear                      |
| ZMW price for anal sex with condom                             | Linear                      |
| ZMW price for anal sex without condom                          | Linear                      |
| Average nightly # of SWCs: other FSW                           | Linear                      |
| Average nightly # of SWCs: respondent                          | Linear                      |
| # of nightly SWCs use condom with                              | Linear                      |
| # of nightly SWCs do not use condom with                       | Poisson                     |
| Unable to use condom when wanted to with SWC in past 12 months | Logistic                    |
| Respondent asks SWC to share HIV status                        | Ordered logistic            |
| SWCs ask respondent to share HIV status                        | Ordered logistic            |
| Age at first sex                                               | Linear                      |
| Ever been pregnant                                             | Logistic                    |
| Number of pregnancies                                          | Poisson                     |
| Number of living children                                      | Poisson                     |
| Ever had unwanted pregnancy                                    | Logistic                    |
| Of which, trying to avoid pregnancy at the time                | Logistic                    |
| Ever ended a pregnancy                                         | Logistic                    |
| Currently using family planning                                | Logistic                    |
| Has a primary partner                                          | Logistic                    |
| Partner knows about sex work                                   | Logistic                    |
| Condom use with primary partner                                | Ordered logistic            |
| Likelihood HIV-positive                                        | Linear                      |
| Likelihood will contract HIV in the next year                  | Linear                      |
| Likelihood woman acquires HIV from single act                  | Linear                      |
| How likely to take actions to reduce risk of HIV               | Ordered logistic            |
| Estimated proportion of FSW living with HIV                    | Linear                      |
| Estimated proportion of SWC living with HIV                    | Linear                      |
| Knows HIV status of primary partner                            | Logistic                    |
| Ever tested for HIV                                            | Logistic                    |
| Months since most recent HIV test                              | Linear                      |
| Received results of most recent HIV test                       | Logistic                    |
| Needed healthcare but unable to access in past 12 months       | Logistic                    |
| Comfortable telling medical provider about sex work            | Logistic                    |
| Feel medical provider judges for sex work                      | Logistic                    |
| Ever been tested for STIs                                      | Logistic                    |
| Months since most recent STI test                              | Linear                      |

| <b>Variable</b>                                                     | <b>Regression form used</b> |
|---------------------------------------------------------------------|-----------------------------|
| Any physical abuse as child (age <15)                               | Logistic                    |
| Any physical abuse as adult (age 15+)                               | Logistic                    |
| Of which, from SWC                                                  | Logistic                    |
| Any physical abuse in past 12 months                                | Logistic                    |
| Of which, from SWC                                                  | Logistic                    |
| Of which, from partner                                              | Logistic                    |
| Any sexual abuse as child (age <15)                                 | Logistic                    |
| Any adult sexual abuse (age 15+)                                    | Logistic                    |
| Of which, from SWC                                                  | Logistic                    |
| Any sexual abuse in past 12 months                                  | Logistic                    |
| Of which, from SWC                                                  | Logistic                    |
| Of which, from partner                                              | Logistic                    |
| Had sex because afraid in past 12 months                            | Logistic                    |
| Of which, with SWC                                                  | Logistic                    |
| Of which, with partner                                              | Logistic                    |
| Frequency of alcohol consumption                                    | Ordered logistic            |
| Frequency of having ≥6 drinks in a night                            | Ordered logistic            |
| Taken any intoxicating substance in past 12 months                  | Logistic                    |
| Taken any non-prescription injected drugs in the past 12 months     | Logistic                    |
| Ever harassed by police                                             | Logistic                    |
| Ever arrested/incarcerated                                          | Logistic                    |
| Stood up to someone to help a fellow FSW in past 12 months          | Logistic                    |
| Attended a public event where identifiable as FSW in past 12 months | Logistic                    |
| Feels strong sense of unity with FSWs in general                    | Ordered logistic            |
| PHQ-9 raw score (range 0 to 27)                                     | Linear                      |
| HIV stigma scale raw score (range 0-9)                              | Linear                      |
| Adapted FSSQ scale raw score (range 0-30)                           | Linear                      |
| Generalized self-efficacy raw score (range 10-40)                   | Linear                      |

**Supplementary Table 2: Impact of interviewer identity on associations between baseline covariates and HIV testing history in an HIV self-test trial amongst female sex workers in Zambia, full regression results**

|                             | Month 1 follow-up, tested in past 30 days |               |      |               |      |               | Month 4 follow-up, tested in past 30 days |               |      |               |      |               |
|-----------------------------|-------------------------------------------|---------------|------|---------------|------|---------------|-------------------------------------------|---------------|------|---------------|------|---------------|
| <b>1. No covariates</b>     |                                           |               |      |               |      |               |                                           |               |      |               |      |               |
| Study arm A                 | 1.00                                      |               | 1.00 |               | 1.00 |               | 1.00                                      |               | 1.00 |               | 1.00 |               |
| Study arm B                 | 1.07                                      | [0.99 - 1.15] | 1.07 | [0.90 - 1.26] | 1.07 | [0.90 - 1.26] | 1.11                                      | [0.98 - 1.26] | 1.13 | [0.94 - 1.36] | 1.14 | [0.94 - 1.37] |
| Study arm C                 | 0.95                                      | [0.86 - 1.05] | 0.95 | [0.80 - 1.13] | 0.94 | [0.79 - 1.12] | 1.06                                      | [0.92 - 1.21] | 1.07 | [0.89 - 1.30] | 1.08 | [0.90 - 1.31] |
| Livingstone                 | 1.00                                      |               | 1.00 |               | 1.00 |               | 1.00                                      |               | 1.00 |               | 1.00 |               |
| Kapiri                      | 0.83                                      | [0.72 - 0.94] | 0.83 | [0.69 - 0.99] | 0.84 | [0.69 - 1.02] | 0.86                                      | [0.78 - 0.96] | 0.85 | [0.52 - 1.39] | 0.72 | [0.44 - 1.20] |
| Chirundu                    | 1.10                                      | [1.04 - 1.15] | 1.10 | [0.93 - 1.29] | 1.10 | [0.93 - 1.31] | 0.79                                      | [0.68 - 0.93] | 0.67 | [0.40 - 1.11] | 0.62 | [0.38 - 1.02] |
| Female vs. male interviewer |                                           |               |      |               | 0.97 | [0.83 - 1.14] |                                           |               |      |               | 1.39 | [0.91 - 2.11] |
| Interviewer random effects  | 1.00                                      |               | 1.00 |               | 1.00 |               | 1.00                                      |               | 1.00 |               | 1.00 |               |
| <b>2. Age</b>               |                                           |               |      |               |      |               |                                           |               |      |               |      |               |
| Study arm A                 | 1.00                                      |               | 1.00 |               | 1.00 |               | 1.00                                      |               | 1.00 |               | 1.00 |               |
| Study arm B                 | 1.07                                      | [1.02 - 1.12] | 1.07 | [0.95 - 1.20] | 1.07 | [0.95 - 1.20] | 1.11                                      | [1.03 - 1.21] | 1.13 | [0.98 - 1.30] | 1.14 | [0.98 - 1.31] |
| Study arm C                 | 0.95                                      | [0.89 - 1.01] | 0.95 | [0.84 - 1.06] | 0.94 | [0.85 - 1.05] | 1.05                                      | [0.97 - 1.15] | 1.07 | [0.95 - 1.20] | 1.08 | [0.97 - 1.21] |
| Livingstone                 | 1.00                                      |               | 1.00 |               | 1.00 |               | 1.00                                      |               | 1.00 |               | 1.00 |               |
| Kapiri                      | 0.82                                      | [0.76 - 0.89] | 0.82 | [0.64 - 1.07] | 0.84 | [0.66 - 1.05] | 0.86                                      | [0.80 - 0.94] | 0.85 | [0.71 - 1.03] | 0.73 | [0.48 - 1.11] |
| Chirundu                    | 1.10                                      | [1.06 - 1.13] | 1.10 | [1.03 - 1.17] | 1.11 | [1.04 - 1.17] | 0.80                                      | [0.73 - 0.88] | 0.67 | [0.21 - 2.16] | 0.62 | [0.18 - 2.16] |
| Age18 - 24                  | 1.00                                      |               | 1.00 |               | 1.00 |               | 1.00                                      |               | 1.00 |               | 1.00 |               |
| Age25 - 29                  | 0.96                                      | [0.92 - 1.02] | 0.96 | [0.91 - 1.03] | 0.96 | [0.91 - 1.03] | 1.00                                      | [0.93 - 1.08] | 1.01 | [0.93 - 1.10] | 1.01 | [0.93 - 1.10] |
| Age30 - 34                  | 0.94                                      | [0.88 - 1.01] | 0.94 | [0.87 - 1.02] | 0.94 | [0.87 - 1.02] | 0.99                                      | [0.91 - 1.08] | 0.97 | [0.91 - 1.04] | 0.97 | [0.91 - 1.04] |
| Age35+                      | 0.94                                      | [0.87 - 1.01] | 0.94 | [0.85 - 1.03] | 0.94 | [0.85 - 1.03] | 0.92                                      | [0.81 - 1.05] | 0.91 | [0.80 - 1.03] | 0.91 | [0.80 - 1.03] |
| Female vs. male interviewer |                                           |               |      |               | 0.97 | [0.91 - 1.04] |                                           |               |      |               | 1.39 | [0.70 - 2.74] |
| Interviewer random effects  | 1.00                                      |               | 1.00 |               | 1.00 |               | 1.00                                      |               | 1.00 |               | 1.00 |               |

|                             | Month 1 follow-up, tested in past 30 days |               |      |               |      |               | Month 4 follow-up, tested in past 30 days |               |      |               |      |               |
|-----------------------------|-------------------------------------------|---------------|------|---------------|------|---------------|-------------------------------------------|---------------|------|---------------|------|---------------|
| <b>3. Physical abuse</b>    |                                           |               |      |               |      |               |                                           |               |      |               |      |               |
| Study arm A                 | 1.00                                      |               | 1.00 |               | 1.00 |               | 1.00                                      |               | 1.00 |               | 1.00 |               |
| Study arm B                 | 1.07                                      | [1.02 - 1.12] | 1.07 | [0.94 - 1.21] | 1.07 | [0.95 - 1.20] | 1.12                                      | [1.04 - 1.21] | 1.13 | [0.98 - 1.31] | 1.14 | [0.98 - 1.32] |
| Study arm C                 | 0.95                                      | [0.89 - 1.01] | 0.95 | [0.84 - 1.07] | 0.94 | [0.85 - 1.05] | 1.07                                      | [0.98 - 1.16] | 1.08 | [0.95 - 1.21] | 1.08 | [0.96 - 1.22] |
| Livingstone                 | 1.00                                      |               | 1.00 |               | 1.00 |               | 1.00                                      |               | 1.00 |               | 1.00 |               |
| Kapiri                      | 0.83                                      | [0.76 - 0.89] | 0.83 | [0.63 - 1.08] | 0.84 | [0.66 - 1.06] | 0.85                                      | [0.78 - 0.92] | 0.85 | [0.71 - 1.02] | 0.72 | [0.48 - 1.10] |
| Chirundu                    | 1.09                                      | [1.06 - 1.13] | 1.09 | [1.03 - 1.17] | 1.10 | [1.04 - 1.17] | 0.79                                      | [0.72 - 0.87] | 0.67 | [0.21 - 2.14] | 0.62 | [0.18 - 2.14] |
| Any physical abuse as adult | 1.00                                      | [0.95 - 1.05] | 1.00 | [0.93 - 1.07] | 0.99 | [0.93 - 1.07] | 0.90                                      | [0.84 - 0.96] | 0.97 | [0.93 - 1.02] | 0.98 | [0.94 - 1.02] |
| Female vs. male interviewer |                                           |               |      |               | 0.97 | [0.90 - 1.05] |                                           |               |      |               | 1.38 | [0.70 - 2.73] |
| Interviewer random effects  |                                           |               | Yes  |               | Yes  |               |                                           |               | Yes  |               | Yes  |               |
| <b>4. Sexual abuse</b>      |                                           |               |      |               |      |               |                                           |               |      |               |      |               |
| Study arm A                 | 1.00                                      |               | 1.00 |               | 1.00 |               | 1.00                                      |               | 1.00 |               | 1.00 |               |
| Study arm B                 | 1.07                                      | [1.02 - 1.12] | 1.07 | [0.94 - 1.21] | 1.07 | [0.95 - 1.20] | 1.12                                      | [1.03 - 1.21] | 1.13 | [0.98 - 1.31] | 1.14 | [0.98 - 1.31] |
| Study arm C                 | 0.95                                      | [0.89 - 1.01] | 0.95 | [0.84 - 1.07] | 0.94 | [0.85 - 1.05] | 1.05                                      | [0.97 - 1.15] | 1.07 | [0.95 - 1.21] | 1.08 | [0.96 - 1.22] |
| Livingstone                 | 1.00                                      |               | 1.00 |               | 1.00 |               | 1.00                                      |               | 1.00 |               | 1.00 |               |
| Kapiri                      | 0.83                                      | [0.76 - 0.89] | 0.83 | [0.63 - 1.08] | 0.84 | [0.66 - 1.06] | 0.86                                      | [0.79 - 0.94] | 0.85 | [0.71 - 1.02] | 0.73 | [0.48 - 1.10] |
| Chirundu                    | 1.09                                      | [1.06 - 1.13] | 1.09 | [1.03 - 1.16] | 1.10 | [1.04 - 1.17] | 0.80                                      | [0.73 - 0.88] | 0.67 | [0.21 - 2.16] | 0.62 | [0.18 - 2.15] |
| Any sexual abuse as adult   | 1.01                                      | [0.97 - 1.06] | 1.01 | [0.97 - 1.06] | 1.01 | [0.97 - 1.06] | 0.92                                      | [0.86 - 0.98] | 0.98 | [0.90 - 1.05] | 0.97 | [0.90 - 1.05] |
| Female vs. male interviewer |                                           |               |      |               | 0.97 | [0.91 - 1.04] |                                           |               |      |               | 1.38 | [0.70 - 2.72] |
| Interviewer random effects  |                                           |               | Yes  |               | Yes  |               |                                           |               | Yes  |               | Yes  |               |

This table provides full results from 24 regressions (12 for each outcome).

All regressions are generalized linear models with a Poisson distribution and log link, and robust standard errors. Month 1 N=884; month 4 N=892.

**Supplementary Table 3: Comparison of bivariate associations from hierarchical models containing random intercepts only for interviewers (two-level) or interviewers and peer educators (three-level)**

|                                              | Two-level models |             |               |         | Three-level models |             |               |         |
|----------------------------------------------|------------------|-------------|---------------|---------|--------------------|-------------|---------------|---------|
|                                              | ICC <sup>b</sup> | Male<br>IVR | Female<br>IVR | p-value | ICC <sup>b</sup>   | Male<br>IVR | Female<br>IVR | p-value |
| Age                                          | 3.9%             | 26.2        | 26.3          | 0.99    | 2.5%               | 26.2        | 26.2          | 1.00    |
| Ever married                                 | 12.5%            | 68.7%       | 75.5%         | 0.69    | 12.2%              | 69.4%       | 76.4%         | 0.69    |
| Currently divorced/separated                 | 10.4%            | 26.8%       | 18.4%         | 0.55    | 10.0%              | 25.9%       | 17.3%         | 0.54    |
| Education                                    |                  |             |               | 0.65    |                    |             |               | 0.64    |
| No formal education                          |                  | 7.3%        | 11.8%         |         |                    | 5.5%        | 9.7%          |         |
| Primary (up to 9 years)                      |                  | 44.6%       | 53.0%         |         |                    | 46.8%       | 56.8%         |         |
| > 9 years                                    |                  | 48.1%       | 35.2%         |         |                    | 47.7%       | 33.5%         |         |
| Able to read and write                       | 9.1%             | 82.8%       | 67.7%         | 0.060   | 8.2%               | 84.7%       | 69.2%         | 0.055   |
| Income (ZMW)                                 |                  |             |               | 0.38    |                    |             |               | 0.34    |
| No income                                    |                  | 2.6%        | 24.8%         |         |                    | 1.5%        | 21.5%         |         |
| <250 kwacha                                  |                  | 9.9%        | 38.4%         |         |                    | 8.4%        | 44.5%         |         |
| 251-500 kwacha                               |                  | 39.1%       | 29.6%         |         |                    | 40.6%       | 28.8%         |         |
| 501-1000 kwacha                              |                  | 37.4%       | 6.2%          |         |                    | 40.5%       | 4.7%          |         |
| 1001-1500 kwacha                             |                  | 6.9%        | 0.6%          |         |                    | 6.1%        | 0.4%          |         |
| >1500 kwacha                                 |                  | 4.2%        | 0.4%          |         |                    | 2.9%        | 0.2%          |         |
| Financial situation                          |                  |             |               | 0.020   |                    |             |               | 0.020   |
| Very poor                                    |                  | 4.8%        | 24.1%         |         |                    | 4.1%        | 23.0%         |         |
| Poor                                         |                  | 32.8%       | 54.1%         |         |                    | 32.7%       | 56.0%         |         |
| Just getting by                              |                  | 46.5%       | 18.9%         |         |                    | 48.3%       | 18.6%         |         |
| Comfortable                                  |                  | 14.2%       | 2.6%          |         |                    | 13.3%       | 2.2%          |         |
| Very comfortable                             |                  | 1.8%        | 0.3%          |         |                    | 1.6%        | 0.2%          |         |
| Mobile phone ownership                       | 6.3%             | 86.4%       | 85.2%         | 0.94    | 4.5%               | 88.7%       | 87.6%         | 0.93    |
| Self-perceived relative SES (10 point scale) |                  | 3.1         | 3.0           | 0.94    |                    | 3.1         | 2.9           | 0.94    |
| Any income from non-sex-work                 | 7.5%             | 30.6%       | 27.3%         | 0.87    | 7.1%               | 29.7%       | 26.3%         | 0.87    |
| Age at first sex for money                   | 1.6%             | 19.8        | 19.0          | 0.38    | 0.9%               | 19.8        | 19.0          | 0.34    |
| Condoms available while working              |                  |             |               | 0.26    |                    |             |               | 0.29    |
| Never                                        |                  | 1.2%        | 2.1%          |         |                    | 0.9%        | 1.6%          |         |
| Seldom                                       |                  | 3.2%        | 5.3%          |         |                    | 2.5%        | 4.4%          |         |
| Sometimes                                    |                  | 60.7%       | 68.3%         |         |                    | 63.4%       | 71.7%         |         |
| Often                                        |                  | 9.7%        | 7.7%          |         |                    | 10.4%       | 7.9%          |         |
| Always                                       |                  | 25.1%       | 16.6%         |         |                    | 22.7%       | 14.4%         |         |
| Ask SWC to use a condom                      |                  |             |               | 0.55    |                    |             |               | 0.54    |
| Never                                        |                  | 2.2%        | 4.0%          |         |                    | 1.5%        | 2.9%          |         |
| Seldom                                       |                  | 3.7%        | 6.4%          |         |                    | 2.9%        | 5.4%          |         |
| Sometimes                                    |                  | 53.2%       | 62.2%         |         |                    | 56.1%       | 66.5%         |         |
| Often                                        |                  | 14.5%       | 11.0%         |         |                    | 15.7%       | 11.3%         |         |
| Always                                       |                  | 26.5%       | 16.4%         |         |                    | 23.8%       | 13.8%         |         |
| SWCs ask to use a condom                     |                  |             |               | 0.49    |                    |             |               | 0.49    |
| Never                                        |                  | 16.2%       | 7.8%          |         |                    | 15.9%       | 7.6%          |         |
| Seldom                                       |                  | 24.7%       | 15.8%         |         |                    | 24.8%       | 15.7%         |         |
| Sometimes                                    |                  | 54.7%       | 66.7%         |         |                    | 55.1%       | 67.3%         |         |
| Often                                        |                  | 2.6%        | 5.6%          |         |                    | 2.5%        | 5.4%          |         |
| Always                                       |                  | 1.8%        | 4.1%          |         |                    | 1.7%        | 4.0%          |         |
| SWCs request that not to use a condom        |                  |             |               | 0.46    |                    |             |               | 0.45    |
| Never                                        |                  | 10.3%       | 4.6%          |         |                    | 9.8%        | 4.2%          |         |
| Seldom                                       |                  | 19.1%       | 10.9%         |         |                    | 19.0%       | 10.6%         |         |
| Sometimes                                    |                  | 55.4%       | 54.5%         |         |                    | 56.8%       | 55.9%         |         |
| Often                                        |                  | 12.7%       | 24.1%         |         |                    | 12.2%       | 23.9%         |         |
| Always                                       |                  | 2.4%        | 5.8%          |         |                    | 2.2%        | 5.4%          |         |
| ZMW price for vaginal sex with condom        | 6.6%             | 101         | 99            | 0.95    | 5.4%               | 102         | 99            | 0.94    |
| ZMW price for vaginal sex without condom     | 7.0%             | 203         | 177           | 0.58    | 5.8%               | 205         | 178           | 0.54    |
| ZMW price for anal sex with condom           | 16.7%            | 146         | 185           | 0.65    | 15.5%              | 145         | 184           | 0.64    |
| ZMW price for anal sex without condom        | 14.8%            | 242         | 263           | 0.89    | 12.7%              | 242         | 259           | 0.92    |
| Average nightly # of SWCs: other FSW         | 18.9%            | 6.0         | 11.2          | 0.69    | 18.7%              | 6.1         | 11.4          | 0.69    |
| Average nightly # of SWCs: respondent        | 10.2%            | 4.0         | 5.6           | 0.58    | 10.1%              | 4.0         | 5.6           | 0.58    |
| # of nightly SWCs use condom with            | 2.3%             | 2.4         | 3.2           | 0.49    | 2.2%               | 2.4         | 3.2           | 0.49    |
| # of nightly SWCs do not use condom with     |                  | 1.4         | 2.2           | 0.40    |                    | 1.3         | 1.8           | 0.26    |

|                                                                | Two-level models |             |               |         | Three-level models |             |               |         |
|----------------------------------------------------------------|------------------|-------------|---------------|---------|--------------------|-------------|---------------|---------|
|                                                                | ICC <sup>b</sup> | Male<br>IVR | Female<br>IVR | p-value | ICC <sup>b</sup>   | Male<br>IVR | Female<br>IVR | p-value |
| Unable to use condom when wanted with client in past 12m       | 17.0%            | 74.0%       | 82.6%         | 0.65    | 16.4%              | 75.1%       | 83.7%         | 0.64    |
| Respondent asks SWC to share HIV status                        |                  |             |               | 0.38    |                    |             |               | 0.37    |
| Never                                                          |                  | 24.2%       | 42.4%         |         |                    | 23.6%       | 42.2%         |         |
| Seldom                                                         |                  | 15.9%       | 17.6%         |         |                    | 16.3%       | 18.1%         |         |
| Sometimes                                                      |                  | 46.4%       | 33.8%         |         |                    | 47.1%       | 33.9%         |         |
| Often                                                          |                  | 6.5%        | 3.2%          |         |                    | 6.4%        | 3.1%          |         |
| Always                                                         |                  | 7.0%        | 3.0%          |         |                    | 6.6%        | 2.8%          |         |
| SWCs asks respondent to share HIV status                       |                  |             |               | 0.95    |                    |             |               | 0.97    |
| Never                                                          |                  | 36.9%       | 34.8%         |         |                    | 36.2%       | 34.5%         |         |
| Seldom                                                         |                  | 18.6%       | 18.4%         |         |                    | 19.2%       | 19.1%         |         |
| Sometimes                                                      |                  | 39.7%       | 41.5%         |         |                    | 40.1%       | 41.6%         |         |
| Often                                                          |                  | 3.2%        | 3.5%          |         |                    | 3.0%        | 3.2%          |         |
| Always                                                         |                  | 1.6%        | 1.8%          |         |                    | 1.5%        | 1.6%          |         |
| Age at first sex                                               | 1.6%             | 16.2        | 16.2          | 1.00    | 1.2%               | 16.2        | 16.2          | 1.00    |
| Ever been pregnant                                             | 2.3%             | 86.3%       | 81.1%         | 0.40    | 1.4%               | 87.5%       | 82.4%         | 0.39    |
| Number of pregnancies                                          |                  | 2.1         | 2.2           | 0.69    |                    | 2.1         | 2.2           | 0.69    |
| Number of living children                                      |                  | 1.6         | 1.8           | 0.59    |                    | 1.6         | 1.8           | 0.59    |
| Ever had unwanted pregnancy                                    | 12.2%            | 60.2%       | 65.4%         | 0.84    | 12.0%              | 60.8%       | 66.5%         | 0.83    |
| Of which, trying to avoid pregnancy at the time                | 19.5%            | 43.0%       | 47.9%         | 0.89    | 19.5%              | 43.0%       | 47.9%         | 0.90    |
| Ever ended a pregnancy                                         | 20.6%            | 44.1%       | 53.2%         | 0.76    | 20.7%              | 43.5%       | 53.3%         | 0.76    |
| Currently using family planning                                | 11.6%            | 79.3%       | 75.8%         | 0.87    | 11.1%              | 80.9%       | 77.3%         | 0.87    |
| Has a primary partner                                          | 2.2%             | 60.4%       | 59.3%         | 0.94    | 1.1%               | 61.6%       | 60.4%         | 0.94    |
| Partner knows about sex work                                   | 15.0%            | 27.2%       | 23.5%         | 0.89    | 14.6%              | 25.6%       | 22.0%         | 0.90    |
| Condom use with primary partner                                |                  |             |               | 0.76    |                    |             |               | 0.76    |
| Never                                                          |                  | 40.2%       | 33.7%         |         |                    | 40.2%       | 33.7%         |         |
| Seldom                                                         |                  | 11.9%       | 11.4%         |         |                    | 11.9%       | 11.4%         |         |
| Sometimes                                                      |                  | 38.7%       | 43.1%         |         |                    | 38.7%       | 43.1%         |         |
| Often                                                          |                  | 2.1%        | 2.6%          |         |                    | 2.1%        | 2.6%          |         |
| Always                                                         |                  | 7.1%        | 9.2%          |         |                    | 7.1%        | 9.2%          |         |
| Likelihood HIV-positive (10 point scale)                       | 8.0%             | 4.9         | 5.4           | 0.55    | 7.6%               | 4.9         | 5.4           | 0.54    |
| Likelihood will contract HIV in the next year (10 point scale) | 6.3%             | 5.9         | 5.9           | 1.00    | 5.5%               | 5.9         | 5.9           | 1.00    |
| Likelihood woman acquires HIV from single act (10 point scale) | 22.6%            | 7.6         | 6.7           | 0.51    | 21.8%              | 7.6         | 6.7           | 0.52    |
| How likely to take actions to reduce risk of HIV               |                  |             |               | 0.76    |                    |             |               | 0.76    |
| Very likely                                                    |                  | 57.3%       | 66.3%         |         |                    | 58.4%       | 67.9%         |         |
| Somewhat likely                                                |                  | 33.6%       | 27.6%         |         |                    | 34.5%       | 27.6%         |         |
| Unlikely                                                       |                  | 5.2%        | 3.6%          |         |                    | 4.3%        | 2.8%          |         |
| Very unlikely                                                  |                  | 3.8%        | 2.5%          |         |                    | 2.8%        | 1.7%          |         |
| Estimated proportion of FSW living with HIV (10 point scale)   | 5.8%             | 7.1         | 7.2           | 0.86    | 5.8%               | 7.1         | 7.2           | 0.86    |
| Estimated proportion of SWC living with HIV (10 point scale)   | 4.0%             | 7.2         | 7.2           | 0.99    | 3.8%               | 7.2         | 7.2           | 0.99    |
| Knows HIV status of primary partner                            | 9.3%             | 40.2%       | 43.0%         | 0.92    | 8.6%               | 39.6%       | 42.3%         | 0.93    |
| Ever tested for HIV                                            | 16.3%            | 84.3%       | 78.8%         | 0.75    | 13.2%              | 89.3%       | 84.3%         | 0.74    |
| Months since last HIV test                                     | 6.3%             | 14.1        | 9.8           | 0.46    | 6.0%               | 14.5        | 9.9           | 0.45    |
| Received results of most recent HIV test                       | 14.4%            | 94.1%       | 93.4%         | 0.95    | 11.7%              | 95.3%       | 94.8%         | 0.94    |
| Needed healthcare but unable to access in past 12 months       | 12.7%            | 35.7%       | 36.1%         | 0.99    | 12.1%              | 34.4%       | 34.7%         | 1.00    |
| Comfortable telling medical provider about sex work            | 16.8%            | 73.9%       | 65.9%         | 0.69    | 16.5%              | 74.7%       | 66.3%         | 0.69    |
| Feel medical provider judges for sex work                      | 29.3%            | 24.1%       | 47.5%         | 0.38    | 29.2%              | 23.0%       | 47.3%         | 0.37    |
| Ever been tested for STIs                                      | 0.2%             | 49.9%       | 48.0%         | 0.87    | 0.0%               | 49.9%       | 47.9%         | 0.87    |
| Months since last tested for STIs                              | 7.7%             | 12.2        | 9.9           | 0.69    | 7.3%               | 12.2        | 9.9           | 0.69    |
| Any physical abuse as child (age <15)                          | 29.4%            | 74.0%       | 52.4%         | 0.46    | 29.0%              | 75.5%       | 52.6%         | 0.46    |
| Any physical abuse as adult (age 15+)                          | 19.9%            | 76.2%       | 54.4%         | 0.26    | 19.7%              | 76.8%       | 54.5%         | 0.26    |
| Of which, from SWC                                             | 27.6%            | 17.7%       | 28.8%         | 0.65    | 26.5%              | 15.9%       | 27.9%         | 0.64    |
| Any physical abuse in past 12m                                 | 20.0%            | 49.8%       | 55.7%         | 0.87    | 19.8%              | 49.7%       | 55.9%         | 0.87    |
| Of which, from SWC                                             | 36.6%            | 36.6%       | 79.4%         | 0.020   | 36.5%              | 35.7%       | 80.4%         | 0.020   |
| Of which, from partner                                         | 35.1%            | 80.8%       | 42.4%         | 0.058   | 35.1%              | 83.5%       | 41.2%         | 0.051   |
| Any sexual abuse as child (age <15)                            | 19.7%            | 36.9%       | 32.7%         | 0.89    | 19.6%              | 36.4%       | 32.0%         | 0.90    |
| Any adult sexual abuse (age 15+)                               | 8.6%             | 45.6%       | 43.4%         | 0.94    | 8.4%               | 45.4%       | 43.1%         | 0.94    |
| Of which, from SWC                                             | 10.8%            | 28.0%       | 36.3%         | 0.67    | 10.8%              | 28.0%       | 36.3%         | 0.68    |
| Any sexual abuse in past 12m                                   | 23.6%            | 41.9%       | 54.1%         | 0.69    | 23.4%              | 41.3%       | 54.3%         | 0.68    |
| Of which, from SWC                                             | 39.1%            | 41.9%       | 83.7%         | 0.001   | 38.7%              | 41.7%       | 84.3%         | 0.002   |
| Of which, from partner                                         | 43.7%            | 53.2%       | 22.8%         | 0.46    | 43.1%              | 53.2%       | 21.5%         | 0.45    |
| Had sex because afraid in past 12m                             | 21.8%            | 55.8%       | 70.1%         | 0.58    | 21.6%              | 56.1%       | 70.9%         | 0.58    |
| Of which, with SWC                                             | 29.8%            | 45.5%       | 76.5%         | 0.040   | 29.5%              | 45.5%       | 76.9%         | 0.040   |

|                                                               | Two-level models |             |               |         | Three-level models |             |               |         |
|---------------------------------------------------------------|------------------|-------------|---------------|---------|--------------------|-------------|---------------|---------|
|                                                               | ICC <sup>b</sup> | Male<br>IVR | Female<br>IVR | p-value | ICC <sup>b</sup>   | Male<br>IVR | Female<br>IVR | p-value |
| Of which, with partner                                        | 37.9%            | 51.8%       | 29.0%         | 0.55    | 37.7%              | 51.8%       | 27.5%         | 0.54    |
| Frequency of alcohol consumption                              |                  |             |               | 0.76    |                    |             |               | 0.73    |
| Never                                                         |                  | 9.3%        | 6.8%          |         |                    | 8.0%        | 5.6%          |         |
| Monthly or less                                               |                  | 4.5%        | 3.5%          |         |                    | 4.3%        | 3.1%          |         |
| 2-4 times/month                                               |                  | 11.2%       | 9.1%          |         |                    | 11.2%       | 8.7%          |         |
| 2-3 times/week                                                |                  | 31.5%       | 29.0%         |         |                    | 33.6%       | 30.5%         |         |
| 4+ times/week                                                 |                  | 43.5%       | 51.7%         |         |                    | 43.0%       | 52.1%         |         |
| Frequency of having ≥6 drinks in a night                      |                  |             |               | 0.99    |                    |             |               | 1.00    |
| Never                                                         |                  | 3.3%        | 3.2%          |         |                    | 2.7%        | 2.7%          |         |
| Monthly or less                                               |                  | 4.5%        | 4.5%          |         |                    | 4.0%        | 4.0%          |         |
| 2-4 times/month                                               |                  | 6.5%        | 6.4%          |         |                    | 6.1%        | 6.1%          |         |
| 2-3 times/week                                                |                  | 44.2%       | 44.0%         |         |                    | 46.5%       | 46.4%         |         |
| 4+ times/week                                                 |                  | 41.4%       | 41.8%         |         |                    | 40.8%       | 40.8%         |         |
| Taken any intoxicating substance in past 12 months            | 15.7%            | 24.4%       | 28.5%         | 0.87    | 14.8%              | 21.7%       | 26.1%         | 0.87    |
| Taken any non-prescription injected drugs in the past 12m     | 33.1%            | 1.2%        | 5.7%          | 0.19    | 27.6%              | 0.7%        | 3.9%          | 0.20    |
| Ever harassed by police                                       | 4.1%             | 28.7%       | 33.9%         | 0.67    | 3.4%               | 27.4%       | 32.8%         | 0.68    |
| Ever arrested/incarcerated                                    | 11.1%            | 21.4%       | 36.3%         | 0.26    | 10.4%              | 19.8%       | 35.2%         | 0.26    |
| Stood up to someone to help a fellow FSW in past 12m          | 24.3%            | 83.1%       | 83.8%         | 0.99    | 23.5%              | 84.3%       | 85.0%         | 0.99    |
| Attended a public event where identifiable as FSW in past 12m | 29.9%            | 35.6%       | 50.0%         | 0.67    |                    | 29.9%       | 35.0%         | 0.68    |
| Feels strong sense of unity with FSWs in general              |                  | 18.7%       | 16.9%         | 0.94    |                    | 17.4%       | 15.8%         | 0.94    |
| PHQ-9 raw score (range 0 to 27)                               | 37.0%            | 9.4         | 10.7          | 0.79    | 36.5%              | 9.4         | 10.7          | 0.80    |
| HIV stigma scale raw score (range 0-9)                        | 9.0%             | 1.0         | 0.6           | 0.38    | 8.4%               | 1.0         | 0.6           | 0.34    |
| Adapted FSSQ scale raw score (range 0-30)                     | 27.5%            | 8.6         | 9.3           | 0.89    | 26.1%              | 8.5         | 9.3           | 0.90    |
| Generalized self-efficacy raw score (range 10-40)             | 34.5%            | 30.7        | 32.8          | 0.67    | 32.6%              | 30.8        | 32.8          | 0.68    |

12m: 12 months. FSSQ: Duke-UNC Functional Social Support Questionnaire; FSW: female sex worker; ICC: Intraclass Correlation Coefficient; IQR: inter-quartile range; IVR: interviewer; PHQ-9: Patient Health Questionnaire-9; SES: socio-economic status; SWC: sex work client; ZMW: Zambian Kwacha: 1 Kwacha ~USD 10.

All regressions included study site fixed effects and interviewer random intercepts. Values for male and female IVR are marginal predicted values based on regression coefficients.

<sup>b</sup> ICC is the proportion of all variance in a model without interviewer gender attributable to variation in interviewer identity; not available for Poisson or ordered logistic models. P-value is for a  $\chi^2$  test, adjusted for multiple testing across all results shown using the Benjamini-Hochberg method.
